# Supplementary material for: Drug Interactions for Patients with Respiratory Diseases Receiving COVID-19 Emerged Treatments
Source: MDPI journal article supplement (doi:10.3390/ijerph182111711), 2021-11-08
Supplement: s1 [file s1]

## **Supplementary Material: Drug interactions for patients with respiratory diseases receiving COVID-19 emerged treatments**

**Marios Spanakis, Athina Patelarou, Evridiki Patelarou and Nikolaos Tzanakis**

The supplementary file contains additional information as supplementary tables regarding the scientific data that were presented in the manuscript regarding detailed cases of PK and/or PD interactions that could lead in occurrence of ADRs for COVID-19 patients.

Table S1. Substrates, inducers and inhibitors for transport proteins, metabolic enzymes and plasma proteins for drugs that are discussed in this work. (X: inhibitor, S: substrate, I: inducer)

|                                             |                                               | Transport proteins |                                         |      |      | Metabolizing enzymes           |        |                             | Plasma proteins |
|---------------------------------------------|-----------------------------------------------|--------------------|-----------------------------------------|------|------|--------------------------------|--------|-----------------------------|-----------------|
| Drugs for COVID-19                          |                                               | P-gp               | OATP/ OCTP                              | MATE | BCRP | CYP3A                          | CYP2D6 | Other CYPs or other enzymes | albumin         |
| <b>Antivirals</b>                           |                                               |                    |                                         |      |      |                                |        |                             |                 |
|                                             | Darunavir                                     | X                  |                                         |      |      | X                              | X      |                             |                 |
|                                             | Fabifavir                                     |                    | X (OAT1 & OAT3)                         |      |      |                                |        | X (CYP2C8, AO, XO)          |                 |
|                                             | Lopinavir/ Ritonavir                          | X                  | X<br>OATP1A2, OATP1B1, OATP1B3, OATP2B1 |      | X    | X                              |        |                             |                 |
|                                             | Remdesivir                                    |                    | X (OATP 1B1/1B3)                        | X    |      | X                              |        |                             |                 |
| <b>Antimicrobials</b>                       |                                               |                    |                                         |      |      |                                |        |                             |                 |
|                                             | Azithromycin                                  | X                  | X<br>OATP1A2<br>OATP2B1                 |      |      | X                              |        |                             | X UGT1A1        |
|                                             | Ivermectin                                    | S                  |                                         |      |      | S                              |        |                             |                 |
|                                             | Nitazoxanide                                  |                    |                                         |      |      |                                |        |                             | S               |
| <b>Immunomodulators</b>                     |                                               |                    |                                         |      |      |                                |        |                             |                 |
|                                             | Anakinra, Canakinumab, Sarilumab, Tocilizumab |                    |                                         |      |      | Increasing enzymatic abundance |        |                             |                 |
|                                             | Baricitinib                                   | S                  | S                                       |      |      | S                              |        |                             |                 |
|                                             | Colchicine                                    | S                  |                                         |      |      | S                              |        |                             |                 |
|                                             | Dexamethasone                                 |                    |                                         |      |      |                                |        |                             |                 |
|                                             | Hydrocortisone                                | I                  | I (OATP2)                               |      |      | I (+CYP3A11)                   |        |                             |                 |
|                                             | Methylprednisolone                            |                    |                                         |      |      |                                |        |                             |                 |
|                                             | Ruxolitinib                                   |                    |                                         |      |      | S                              |        | S (CYP1A2, CYP2C9, CYP2B6)  |                 |
| <b>Medications for respiratory diseases</b> |                                               |                    |                                         |      |      |                                |        |                             |                 |
|                                             | Xanthines                                     |                    |                                         |      |      | S                              |        | S (CYP1A2, CYP2C9,)         |                 |
|                                             | zafirlukast                                   |                    |                                         |      |      | S                              |        |                             |                 |
|                                             | Montelukast                                   |                    |                                         |      |      | S                              |        |                             |                 |
|                                             | Astemizole                                    |                    |                                         |      |      | S                              |        |                             |                 |
|                                             | Cetirizine/levocetirizine                     |                    |                                         |      |      |                                | S      |                             |                 |

Table S2. Drug-Drug interactions between emerged treatments for COVID-19 and other medications (Clinical Significance: Serious–Use alternative= +++, Use with caution–Monitor= ++, moderate–minor=+)

| Drugs in COVID-19 |                                               | DDI | Biological Pathways involved/ Clinical result                                | Clinical significance | Examples of drugs that can be result in DDIs                                                                                                                                                                                                                                                                                                                                                                                                                                                                                                                                                                                                                                                                                                                                                                                                                                                                                                                                                                               |
|-------------------|-----------------------------------------------|-----|------------------------------------------------------------------------------|-----------------------|----------------------------------------------------------------------------------------------------------------------------------------------------------------------------------------------------------------------------------------------------------------------------------------------------------------------------------------------------------------------------------------------------------------------------------------------------------------------------------------------------------------------------------------------------------------------------------------------------------------------------------------------------------------------------------------------------------------------------------------------------------------------------------------------------------------------------------------------------------------------------------------------------------------------------------------------------------------------------------------------------------------------------|
| Antivirals        | Atazanavir                                    | PK  | CYP3A4, UGT1A1 (inhibitor)                                                   | +++                   | NRTIs, NNRTIs, anti-HCV, irinotecan, amiodarone, quinidine, diltiazem, bepridil, statins                                                                                                                                                                                                                                                                                                                                                                                                                                                                                                                                                                                                                                                                                                                                                                                                                                                                                                                                   |
|                   | Darunavir                                     | PK  | CYP3A4, CYP2D6, P-gp (inhibitor)                                             | +++                   | alfuzosin, DOACs, PAIs, anticoagulants, anticonvulsants SSRIs, TCAs, antipsychotics, voriconazole, colchicine, cisapride, $\beta$ -blockers, Ca2+blockers, ranolazine, ivabradine, statins                                                                                                                                                                                                                                                                                                                                                                                                                                                                                                                                                                                                                                                                                                                                                                                                                                 |
|                   | Favipavir                                     | PK  | AO, CYP2C8                                                                   | +                     | amodiaquine, cerivastatin, dasabuvir, enzalutamide, imatinib, loperamide, montelukast, paclitaxel, pioglitazone, repaglinide, and rosiglitazone                                                                                                                                                                                                                                                                                                                                                                                                                                                                                                                                                                                                                                                                                                                                                                                                                                                                            |
|                   | Lopinavir/ ritonavir                          | PK  | CYP3A4, OATP1A2, OATP1B1, OATP1B3, OATP2B1, BCRP                             | +++                   | colchicine, alfuzosin, ranolazine, antiarrhythmics, statins, lomitapide, anticoagulants, astemizole, terfenadine, tadalafil                                                                                                                                                                                                                                                                                                                                                                                                                                                                                                                                                                                                                                                                                                                                                                                                                                                                                                |
|                   | Remdesivir                                    | PK  | CYP3A, OATP1B1, OATP1B3, MATE1                                               | ++                    | Dexamethasone, rifampicin, barbiturates, ACE inhibitors, antiviral agents, beta-lactam antibiotics, antineoplastics, metformin, NSAIDs, antiandrogens, barbiturates, statins, midazolam                                                                                                                                                                                                                                                                                                                                                                                                                                                                                                                                                                                                                                                                                                                                                                                                                                    |
|                   | Ribavirin                                     | PD  | myelosuppression, hepatotoxicity, pancreatitis hypoprothrombinemic, anti-HIV | +++                   | 6-mercaptopurine, azathioprine, didanosine, bexarotene, anticoagulants, NRTIs                                                                                                                                                                                                                                                                                                                                                                                                                                                                                                                                                                                                                                                                                                                                                                                                                                                                                                                                              |
| Antimicrobial     | Azithromycin                                  | PK  | P-gp, OATP1A2, OATP2B1, CYP3A                                                | ++                    | betrixaban, digoxin, antacids, nelfinavir, fluconazole, cyclosporin                                                                                                                                                                                                                                                                                                                                                                                                                                                                                                                                                                                                                                                                                                                                                                                                                                                                                                                                                        |
|                   | Azithromycin, Chloroquine, Hydroxychloroquine | PD  | hERG -> QT-prolongation                                                      | +++                   | amifampridine; amiodarone; amisulpride; amitryptiline; apomorphine; bedaquiline; bosutinib; cabozantinib; ceritinib; chlorpromazine; ciprofloxacin; cisapride; citalopram; clarithromycin; clomipramine; crizotinib; dasatinib; delamanid; deofetilide; desipramine; disopyramide; dolasetron; doxepin; dronedarone; droperidol; efavirenz; encorafenib; eribulin; erythromycin; escitalopram; flecainide; fluconazole; fluoxetine; haloperidol; hydroxyzine; ibutilide; imipramine; inotuzumab; itraconazol; eketoconazol; elapatinib; lenvatinib; levofloxacin; levomepromazine; lithium; lofexidine; methadone; moxifloxacin; nilotinib; ondansetron; paliperidone; pazopanib; pimozone; procainamide; quetiapine; quinine; ranolazine; ribociclib; risperidone; saquinavir; sertraline; sildenafil; sorafenib; sotalol; sulpiride; sumatriptan; sunitinib; tetrabenazine; thioridazine; tizanidine; tolterodine; toremifene; vandetanib; vardenafil; vemurafenib; venlafaxine; voriconazole; ziprasidone; zolmitriptan |
|                   |                                               | PD  | Convulsion threshold                                                         | +++                   | antiepileptics                                                                                                                                                                                                                                                                                                                                                                                                                                                                                                                                                                                                                                                                                                                                                                                                                                                                                                                                                                                                             |
|                   |                                               | PD  | Glucose homeostasis                                                          | ++                    | Diabetes I drugs                                                                                                                                                                                                                                                                                                                                                                                                                                                                                                                                                                                                                                                                                                                                                                                                                                                                                                                                                                                                           |
|                   |                                               | PD  | ANS                                                                          | +                     | parasympathomimetics                                                                                                                                                                                                                                                                                                                                                                                                                                                                                                                                                                                                                                                                                                                                                                                                                                                                                                                                                                                                       |
|                   | Ivermectin                                    | PK  | P-gp, CYP3A                                                                  | ++                    | clarithromycin, erythromycin, diltiazem, ranolazine, itraconazole, ketoconazole, ritonavir, verapamil, grapefruit                                                                                                                                                                                                                                                                                                                                                                                                                                                                                                                                                                                                                                                                                                                                                                                                                                                                                                          |
|                   | Nitazoxanide                                  | PK  | Protein binding affinity                                                     | ++                    | benzodiazepines, warfarin, valproic acid                                                                                                                                                                                                                                                                                                                                                                                                                                                                                                                                                                                                                                                                                                                                                                                                                                                                                                                                                                                   |

|                  |                                                        |    |                                                        |     |                                                                                                                                                                                                                                                                                                                                                                                                                                                                                                                                                                                                                                                                                                                                                                                                                                                                                                                                                                                                                                                                 |
|------------------|--------------------------------------------------------|----|--------------------------------------------------------|-----|-----------------------------------------------------------------------------------------------------------------------------------------------------------------------------------------------------------------------------------------------------------------------------------------------------------------------------------------------------------------------------------------------------------------------------------------------------------------------------------------------------------------------------------------------------------------------------------------------------------------------------------------------------------------------------------------------------------------------------------------------------------------------------------------------------------------------------------------------------------------------------------------------------------------------------------------------------------------------------------------------------------------------------------------------------------------|
| Immunomodulators | Anakinra,<br>Canakinumab<br>Sarilumab<br>Tocilizumab   | PK | CYP abundance                                          | ++  | CYP substrates, especially drugs of narrow therapeutic index<br>atorvastatin, calcium channel blockers, theophylline, warfarin, phenytoin,<br>ciclosporin, benzodiazepines etc.                                                                                                                                                                                                                                                                                                                                                                                                                                                                                                                                                                                                                                                                                                                                                                                                                                                                                 |
|                  | Baricitinib                                            | PK | OAT3                                                   | +++ | probenecid                                                                                                                                                                                                                                                                                                                                                                                                                                                                                                                                                                                                                                                                                                                                                                                                                                                                                                                                                                                                                                                      |
|                  |                                                        | PD | immunosuppression                                      | +++ | JAK inhibitors or other biologic DMARDs                                                                                                                                                                                                                                                                                                                                                                                                                                                                                                                                                                                                                                                                                                                                                                                                                                                                                                                                                                                                                         |
|                  | Colchicine                                             | PK | P-gp, CYP3A (substrate)                                | ++  | clarithromycin, erythromycin, diltiazem, ranolazine, itraconazole,<br>ketoconazole, ritonavir, verapamil, grapefruit                                                                                                                                                                                                                                                                                                                                                                                                                                                                                                                                                                                                                                                                                                                                                                                                                                                                                                                                            |
|                  | Fingolimod                                             | PD | immunosuppression                                      | +++ | immunomodulating agents                                                                                                                                                                                                                                                                                                                                                                                                                                                                                                                                                                                                                                                                                                                                                                                                                                                                                                                                                                                                                                         |
|                  |                                                        |    | hERG -> QT-prolongation                                | +++ | amifampridine; amiodarone; amisulpride; amitriptyline; apomorphine;<br>bedaquiline; bosutinib; cabozantinib; ceritinib; chlorpromazine;<br>ciprofloxacin; cisapride; citalopram; clarithromycin; clomipramine;<br>crizotinib; dasatinib; delamanid; deofetilide; desipramine; disopyramide;<br>dolasetron; doxepin; dronedarone; droperidol; efavirenz ;encorafenib;<br>eribulin; erythromycin; escitalopram; flecainide; fluconazole; fluoxetine;<br>haloperidol; hydroxyzine; ibutilide; imipramine; inotuzumab; itraconazol;<br>ketoconazol; elapatinib; lenvatinib; levoﬂoxacin; levomepromazine;<br>lithium; lofexidine; methadone; moxifloxacin; nilotinib; ondansetron;<br>paliperidone; pazopanib; pimozone; procainamide; quetiapine; quinine;<br>ranolazine; ribociclib; risperidone; saquinavir; sertraline; sildenafil;<br>sorafenib; sotalol; sulpiride; sumatriptan; sunitinib; tetrabenazine;<br>thioridazine; tizanidine; tolterodine; toremifene; vandetanib; vardenafil;<br>vemurafenib; venlafaxine; voriconazole; ziprasidone; zolmitriptan |
|                  |                                                        |    | bradyarrhythmia                                        | ++  | Cardiovascular medications                                                                                                                                                                                                                                                                                                                                                                                                                                                                                                                                                                                                                                                                                                                                                                                                                                                                                                                                                                                                                                      |
|                  | Dexamethasone<br>Hydrocortisone,<br>methylprednisolone | PD | potassium homeostasis                                  | ++  | diuretics, laxatives, digoxin                                                                                                                                                                                                                                                                                                                                                                                                                                                                                                                                                                                                                                                                                                                                                                                                                                                                                                                                                                                                                                   |
|                  |                                                        | PK | P-gp, OATP2, CYP3A11,<br>CYP2B10, CYP3A4<br>(inducers) | +   | CYP substrates, especially drugs of narrow therapeutic index                                                                                                                                                                                                                                                                                                                                                                                                                                                                                                                                                                                                                                                                                                                                                                                                                                                                                                                                                                                                    |
|                  | Ruxolitinib                                            | PD | heart rate (PR interval)                               | +++ | antiarrhythmics, $\beta$ -blockers, non-dihydropyridine calcium channel<br>blockers, digitalis glycosides, cholinesterase inhibitors, sphingosine-1<br>phosphate receptor modulators, and HIV protease inhibitors                                                                                                                                                                                                                                                                                                                                                                                                                                                                                                                                                                                                                                                                                                                                                                                                                                               |
|                  |                                                        | PK | CYP1A2, CYP2B6,<br>CYP2C9, CYP3A4                      | ++  | clarithromycin, erythromycin, diltiazem, ranolazine, itraconazole,<br>ketoconazole, ritonavir, verapamil, grapefruit                                                                                                                                                                                                                                                                                                                                                                                                                                                                                                                                                                                                                                                                                                                                                                                                                                                                                                                                            |

Table S3. Drug-Drug interactions between emerged treatments for COVID-19 and respiratory medications (Clinical Significance: Serious–Use alternative= +++, Use with caution-Monitor= ++, moderate-minor=+)

| Respiratory medications (ATC codes)                                          |                                                                                                                                                            | Interacting medications for COVID-19                                   | Pharmacological Mechanism, Clinical outcome   | Clinical Significance |
|------------------------------------------------------------------------------|------------------------------------------------------------------------------------------------------------------------------------------------------------|------------------------------------------------------------------------|-----------------------------------------------|-----------------------|
| <b>R03AC<br/>Selective <math>\beta</math>-2-<br/>adrenoreceptor agonists</b> | Salbutamol<br>Terbutaline<br>Fenoterol<br>Rimiterol<br>Hexoprenaline<br>Isoetarine<br>Pirbuterol<br>Tretoquinol<br>Carbuterol<br>Tulobuterol<br>Salmeterol | Azithromycin, chloroquine, hydroxychloroquine, lopinavir               | PD, hERG -> QT-prolongation                   | ++                    |
|                                                                              | Formoterol<br>Clenbuterol<br>Reproterol<br>Procaterol<br>Bitolterol<br>Indacaterol<br>Olodaterol                                                           | Dexamethasone, hydrocortisone, methylprednisolone                      | PD, Hypokalemia                               | +                     |
| <b>R03BA Glucocorticoids</b>                                                 | Budesonide,<br>Flunisolide,<br>Betamethasone,<br>Fluticasone,<br>Triamcinolone                                                                             | atazanavir, ritonavir,                                                 | PK, CYP3A4 elevated drug concentrations       | ++                    |
|                                                                              | Mometasone<br>Ciclesonide                                                                                                                                  | anakinra, baricitinib, canakinumab                                     | PD, myelosuppression, neutropenia             | ++                    |
| <b>R03BB Anticholinergics</b>                                                | Revefenacin                                                                                                                                                | atazanavir, lopinavir/ritonavir                                        | PK, OAT1B1/ 1B3 elevated drug concentrations  | ++                    |
| <b>R03DA<br/>Xanthines</b>                                                   | Aminophylline,<br>Theophylline                                                                                                                             | azithromycin, ritonavir, anakinra, canakinumab, sarilumab, tocilizumab | PK, CYP3A4 and CYP1A2 abundance               | ++                    |
|                                                                              |                                                                                                                                                            | dexamethasone, hydrocortisone, methylprednisolone                      | PD, Hypokalemia                               | +                     |
| <b>R03DC<br/>Leukotriene<br/>receptor antagonists</b>                        | zafirlukast                                                                                                                                                | chloroquine, hydroxychloroquine, remdesivir, colchicine, tocilizumab   | PD Neuropathy & hepatotoxicity (remdesivir)   | ++                    |
|                                                                              | zileuton                                                                                                                                                   | atazanavir, lopinavir/ritonavir, ruxolitinib                           | PK, CYP3A4                                    | ++                    |
|                                                                              | montelukast                                                                                                                                                | Dexamethasone, hydrocortisone, methylprednisolone                      | PK, CYP induction decrease drug concentration | +                     |

|                                                                        |                                                             |                                               |                                        |     |
|------------------------------------------------------------------------|-------------------------------------------------------------|-----------------------------------------------|----------------------------------------|-----|
| <b>R06AD</b><br><b>Phenothiazine</b><br><b>derivatives</b>             | Thiethylperazine,<br>Methdilazine                           | ribavirin                                     | CYP2D6                                 | ++  |
| <b>R06AE</b><br><b>Piperazine derivatives</b>                          | Cyclizine<br>Chlorcyclizine<br>Cetirizine<br>Levocetirizine | ribavirin                                     | Renal elimination                      | ++  |
| <b>R06AX</b><br><b>Other antihistamines for</b><br><b>systemic use</b> | Astemizole,<br>Terfenadine                                  | atazanavir, ribavirin                         | CYP3A4 elevated drug<br>concentrations | ++  |
|                                                                        |                                                             | azithromycin, chloroquine, hydroxychloroquine | hERG -> QT-prolongation                | +++ |
